# Supplementary material for: Osteopontin facilitates West Nile virus neuroinvasion via neutrophil “Trojan horse” transport
Source: PubMed Central journal article supplement (PMC5498593; doi:10.1038/s41598-017-04839-7), 2017-07-05

## Supplemental Materials

### **Osteopontin facilitates West Nile virus neuroinvasion via neutrophil “Trojan horse” transport**

Amber M. Paul, Dhiraj Acharya, Laurel Duty, E. Ashley Thompson, Linda Le, Dobrivoje

S. Stokic, A. Arturo Leis and Fengwei Bai

**Supplemental Figure 1. Flow cytometric gating scheme.** Brain-infiltrating cells were profiled by gating CD45<sup>high</sup> populations from total events recorded. The subpopulations within CD45<sup>high</sup> population including CD4<sup>+</sup> cells (CD4<sup>+</sup> / CD45<sup>high</sup>), CD8<sup>+</sup> cells (CD8<sup>+</sup> / CD45<sup>high</sup>), CD19<sup>+</sup> cells (CD19<sup>+</sup> / CD45<sup>high</sup>), PMNs (CD11b<sup>+</sup>Ly6G<sup>+</sup> / CD45<sup>high</sup>) and myeloid cells (CD11b<sup>+</sup>Ly6G<sup>-</sup> / CD45<sup>high</sup>) were further analyzed. Percentage of WNV antigen positive cells were also gated within each subpopulation (CD4, CD8, CD19, PMNs and myeloid cells) with an example histogram for the percentage of WNV<sup>+</sup>PMN in total infiltrating PMNs is shown. In addition, the % of WNV<sup>+</sup>Ly6G<sup>+</sup> (WNV-PMNs) in total CD45<sup>high</sup> cells were analyzed as shown.

**Supplemental Figure 1.**

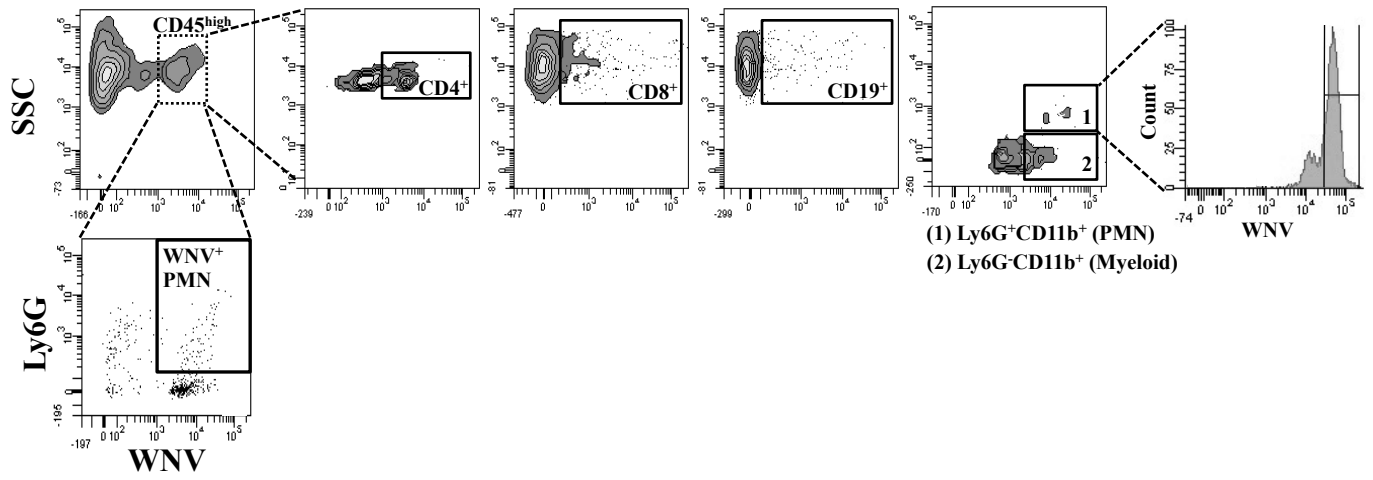

Supplement: 41598_2017_4839_MOESM1_ESM.pdf [file 41598_2017_4839_MOESM1_ESM.pdf]
